# Supplementary material for: Short term effects of coffee components consumption on gut microbiota in patients with non-alcoholic fatty liver and diabetes: A pilot randomized placebo-controlled, clinical trial
Source: PubMed Central journal article supplement (PMC7105939; doi:10.17179/excli2019-2021), 2020-03-02
Supplement: EXCLI-19-241-s-001.pdf [file EXCLI-19-241-s-001.pdf]

**Supplementary data to:**

**SHORT TERM EFFECTS OF COFFEE COMPONENTS  
CONSUMPTION ON GUT MICROBIOTA IN PATIENTS WITH  
NON-ALCOHOLIC FATTY LIVER AND DIABETES: A PILOT  
RANDOMIZED PLACEBO-CONTROLLED, CLINICAL TRIAL**

Asieh Mansour<sup>1,2</sup>, Mohammad Reza Mohajeri-Tehrani<sup>2</sup>, Sara Karimi<sup>1</sup>, Milad Sanginabadi<sup>3</sup>,  
Hossein Poustchi<sup>4</sup>, Samaneh Enayati<sup>5</sup>, Saeedeh Asgarbeik<sup>5</sup>, Javad Nasrollahzadeh<sup>1</sup>,  
Azita Hekmatdoost<sup>1\*</sup>

<sup>1</sup> Department of Clinical Nutrition and Dietetics, Faculty of Nutrition and Food Technology, National Nutrition and Food Technology, Research Institute Shahid Beheshti University of Medical Science, Tehran, Iran

<sup>2</sup> Endocrinology and Metabolism Research Center, Endocrinology and Metabolism Clinical Sciences Institute, Tehran University of Medical Sciences, Tehran, Iran

<sup>3</sup> Radiology Department, Shariati Hospital, Tehran University of Medical Sciences, Tehran, Iran

<sup>4</sup> Liver and Pancreatobiliary Diseases Research Center, Digestive Diseases Research Institute, Tehran University of Medical Sciences, Tehran, Iran

<sup>5</sup> Metabolic Disorders Research Center, Endocrinology and Metabolism Molecular Cellular Sciences Institute, Tehran University of Medical Sciences, Tehran, Iran

\* **Corresponding author:** Azita Hekmatdoost, Department of Clinical Nutrition and Dietetics, Faculty of Nutrition and Food Technology, National Nutrition and Food Technology, Research Institute Shahid Beheshti University of Medical Science, Tehran, Iran, E-mail: [a\\_hekmat2000@yahoo.com](mailto:a_hekmat2000@yahoo.com)

<http://dx.doi.org/10.17179/excli2019-2021>

This is an Open Access article distributed under the terms of the Creative Commons Attribution License (<http://creativecommons.org/licenses/by/4.0/>).

**Supplementary Table 1:** Raw data of the anthropometric parameters, REE and physical activity in each group before and after intervention. The below raw data are related to Table 1 and 2 in the main text.

| Code | Weight (kg) Before | Weight (kg) After | BMI (kg/m <sup>2</sup> ) Before | BMI (kg/m <sup>2</sup> ) After | Fat mass(kg) Before | Fat mass(kg) After | Waist (cm) Before | Waist (cm) After | REE (kcal) Before | REE (kcal) After | Physical activity (METs) Before | Physical activity (METs) After |
|------|--------------------|-------------------|---------------------------------|--------------------------------|---------------------|--------------------|-------------------|------------------|-------------------|------------------|---------------------------------|--------------------------------|
| A11  | 86.10              | 85.40             | 27.20                           | 27.00                          | 18.40               | 21.10              | 105.50            | 105.00           | 2578.00           | 2494.00          | 32.85                           | 29.00                          |
| A15  | 92.60              | 94.70             | 31.30                           | 32.00                          | 34.70               | 42.30              | 110.00            | 111.00           | 1497.00           | 1425.00          | 28.90                           | 27.25                          |
| A17  | 101.50             | 103.90            | 31.30                           | 32.10                          | 29.40               | 30.80              | 111.00            | 112.50           | 2359.00           | 2871.00          | 33.35                           | 34.24                          |
| A19  | 93.70              | 91.80             | 31.30                           | 30.70                          | 30.30               | 28.00              | 110.00            | 114.00           | 2354.00           | 1880.00          | 28.80                           | 28.27                          |
| A5   | 78.10              | 75.40             | 33.80                           | 32.60                          | 32.60               | 35.10              | 111.00            | 107.00           | 1623.00           | 1545.00          | 35.55                           | 32.10                          |
| A9   | 87.50              | 89.90             | 27.00                           | 27.70                          | 19.20               | 30.40              | 102.00            | 100.50           | 1632.00           | 2076.00          | 31.77                           | 32.14                          |
| B11  | 132.00             | 127.70            | 41.00                           | 39.40                          | 47.00               | 48.50              | 132.00            | 131.00           | 2374.00           | 1631.00          | 29.30                           | 26.50                          |
| B12  | 94.20              | 88.50             | 32.20                           | 30.30                          | 27.20               | 25.00              | 110.00            | 104.00           | 1885.00           | 1908.00          | 26.30                           | 32.40                          |
| B19  | 80.40              | 77.80             | 25.40                           | 24.60                          | 16.00               | 13.00              | 99.00             | 95.00            | 1874.00           | 2200.00          | 35.70                           | 26.07                          |
| B25  | 103.10             | 99.30             | 34.80                           | 33.60                          | 34.60               | 30.10              | 115.00            | 113.00           | 1837.00           | 1838.00          | 33.25                           | 34.30                          |
| B3   | 77.10              | 75.00             | 26.40                           | 25.60                          | 13.80               | 15.80              | 96.00             | 93.00            | 1522.00           | 1671.00          | 23.00                           | 47.40                          |
| B7   | 115.20             | 109.60            | 33.30                           | 31.70                          | 31.20               | 32.90              | 125.00            | 123.00           | 2490.00           | 2637.00          | 27.90                           | 27.90                          |
| B8   | 82.00              | 80.30             | 28.40                           | 27.80                          | 16.40               | 19.30              | 99.00             | 98.00            | 1688.00           | 1615.00          | 24.70                           | 37.49                          |
| C1   | 85.70              | 85.70             | 33.50                           | 33.47                          | 35.70               | 35.20              | 120.00            | 113.00           | 1744.00           | 1634.00          | 34.70                           | 27.70                          |
| C12  | 116.90             | 118.10            | 35.30                           | 35.70                          | 31.20               | 37.60              | 124.00            | 127.50           | 1790.00           | 2918.00          | 28.35                           | 30.86                          |
| C2   | 73.50              | 74.20             | 24.00                           | 24.00                          | 14.20               | 14.60              | 94.00             | 97.00            | 1587.00           | 1476.00          | 32.45                           | 28.95                          |
| C21  | 97.70              | 96.10             | 31.20                           | 30.70                          | 27.70               | 26.40              | 115.00            | 115.00           | 2198.00           | 2041.00          | 37.10                           | 32.25                          |
| C3   | 89.40              | 89.80             | 30.90                           | 31.10                          | 19.40               | 22.70              | 110.00            | 108.00           | 2126.00           | 1927.00          | 34.90                           | 34.05                          |
| C6   | 101.00             | 97.70             | 34.50                           | 33.40                          | 35.20               | 33.90              | 120.00            | 118.00           | 2100.00           | 2725.00          | 39.90                           | 35.30                          |
| D11  | 80.40              | 79.20             | 25.10                           | 24.70                          | 17.00               | 18.40              | 99.00             | 94.00            | 1565.00           | 1650.00          | 28.44                           | 32.25                          |
| D19  | 101.50             | 98.50             | 35.10                           | 34.10                          | 44.10               | 46.40              | 109.00            | 104.00           | 2071.00           | 1726.00          | 31.34                           | 26.50                          |
| D2   | 74.60              | 72.00             | 34.10                           | 32.90                          | 27.10               | 25.70              | 106.00            | 102.50           | 1649.00           | 1523.00          | 31.17                           | 32.80                          |
| D21  | 93.10              | 95.00             | 29.40                           | 30.00                          | 23.00               | 25.90              | 113.00            | 116.00           | 2145.00           | 1752.00          | 28.05                           | 29.45                          |
| D22  | 96.60              | 97.00             | 28.80                           | 28.95                          | 23.50               | 25.20              | 111.00            | 110.00           | 1858.00           | 2113.00          | 25.60                           | 27.07                          |
| D3   | 84.80              | 85.50             | 31.90                           | 31.40                          | 24.00               | 26.00              | 105.00            | 104.00           | 1983.00           | 1640.00          | 31.90                           | 31.05                          |
| D5   | 83.90              | 82.80             | 27.40                           | 27.00                          | 17.70               | 17.10              | 102.00            | 100.00           | 1561.00           | 1213.00          | 35.20                           | 37.65                          |

BMI: body mass index; REE: resting energy expenditure; MET: metabolic equivalent of tasks

**Supplementary Table 1** (cont.): Raw data of the FBS, insulin and lipid profile in each group before and after intervention. The below raw data are related to Table 1 and 2 in the main text.

| Code | Insulin (mU/L) Before | Insulin (mU/L) After | FBS (mg/dL) Before | FBS (mg/dL) After | TG (mg/dL) Before | TG (mg/dL) After | Cholesterol (mg/dL) Before | Cholesterol (mg/dL) After | HDL (mg/dL) Before | HDL (mg/dL) After | LDL (mg/dL) Before | LDL (mg/dL) After |
|------|-----------------------|----------------------|--------------------|-------------------|-------------------|------------------|----------------------------|---------------------------|--------------------|-------------------|--------------------|-------------------|
| A11  | 10.00                 | 7.80                 | 151.00             | 134.00            | 314.00            | 263.00           | 112.00                     | 136.00                    | 22.00              | 20.00             | 42.00              | 63.00             |
| A15  | 14.50                 | 8.30                 | 135.00             | 165.00            | 148.00            | 107.00           | 207.00                     | 164.00                    | 43.00              | 34.00             | 133.00             | 109.00            |
| A17  | 6.90                  | 10.90                | 107.00             | 124.00            | 268.00            | 162.00           | 156.00                     | 137.00                    | 39.00              | 34.00             | 63.00              | 71.00             |
| A19  | 13.60                 | 9.80                 | 139.00             | 146.00            | 155.00            | 133.00           | 116.00                     | 123.00                    | 37.00              | 32.00             | 47.00              | 64.00             |
| A5   | 8.80                  | 11.00                | 278.00             | 269.00            | 133.00            | 155.00           | 176.00                     | 171.00                    | 46.00              | 45.00             | 100.00             | 99.00             |
| A9   | 11.30                 | 7.00                 | 309.00             | 238.00            | 479.00            | 1407.00          | 227.00                     | 321.00                    | 26.00              | 21.00             | 113.00             | 69.00             |
| B11  | 23.20                 | 18.40                | 99.00              | 97.00             | 109.00            | 128.00           | 220.00                     | 179.00                    | 41.00              | 33.00             | 155.00             | 120.00            |
| B12  | 12.00                 | 4.50                 | 132.00             | 113.00            | 184.00            | 148.00           | 193.00                     | 164.00                    | 33.00              | 23.00             | 126.00             | 111.00            |
| B19  | 7.90                  | 6.10                 | 106.00             | 129.00            | 144.00            | 127.00           | 194.00                     | 162.00                    | 38.00              | 29.00             | 128.00             | 108.00            |
| B25  | 18.70                 | 14.70                | 87.00              | 100.00            | 99.00             | 141.00           | 112.00                     | 113.00                    | 33.00              | 27.00             | 56.00              | 58.00             |
| B3   | 10.50                 | 5.30                 | 159.00             | 144.00            | 83.00             | 96.00            | 144.00                     | 154.00                    | 27.00              | 32.00             | 100.00             | 102.00            |
| B7   | 19.00                 | 23.60                | 196.00             | 166.00            | 485.00            | 337.00           | 210.00                     | 208.00                    | 14.00              | 21.00             | 100.00             | 118.00            |
| B8   | 10.80                 | 8.70                 | 198.00             | 195.00            | 169.00            | 199.00           | 144.00                     | 172.00                    | 29.00              | 34.00             | 80.00              | 98.00             |
| C1   | 14.40                 | 17.30                | 140.00             | 122.00            | 111.00            | 153.00           | 149.00                     | 178.00                    | 48.00              | 54.00             | 71.00              | 94.00             |
| C12  | 14.40                 | 13.40                | 115.00             | 118.00            | 178.00            | 365.00           | 158.00                     | 156.00                    | 25.00              | 21.00             | 98.00              | 62.00             |
| C2   | 8.90                  | 9.60                 | 197.00             | 199.00            | 120.00            | 139.00           | 133.00                     | 181.00                    | 27.00              | 34.00             | 74.00              | 119.00            |
| C21  | 7.20                  | 5.80                 | 94.00              | 124.00            | 308.00            | 178.00           | 155.00                     | 143.00                    | 27.00              | 27.00             | 65.00              | 80.00             |
| C3   | 22.70                 | 13.70                | 158.00             | 178.00            | 300.00            | 259.00           | 173.00                     | 210.00                    | 28.00              | 39.00             | 69.00              | 119.00            |
| C6   | 7.40                  | 22.40                | 188.00             | 322.00            | 348.00            | 439.00           | 160.00                     | 172.00                    | 22.00              | 17.00             | 62.00              | 46.00             |
| D11  | 9.10                  | 4.70                 | 113.00             | 97.00             | 95.00             | 82.00            | 173.00                     | 150.00                    | 52.00              | 41.00             | 98.00              | 93.00             |
| D19  | 12.20                 | 5.70                 | 124.00             | 129.00            | 100.00            | 122.00           | 115.00                     | 119.00                    | 36.00              | 31.00             | 59.00              | 64.00             |
| D2   | 11.70                 | 8.10                 | 103.00             | 124.00            | 71.00             | 79.00            | 109.00                     | 136.00                    | 44.00              | 50.00             | 45.00              | 70.00             |
| D21  | 5.40                  | 6.00                 | 268.00             | 238.00            | 164.00            | 192.00           | 177.00                     | 210.00                    | 39.00              | 40.00             | 107.00             | 132.00            |
| D22  | 12.70                 | 11.90                | 115.00             | 138.00            | 296.00            | 355.00           | 153.00                     | 182.00                    | 28.00              | 27.00             | 64.00              | 76.00             |
| D3   | 9.60                  | 7.50                 | 109.00             | 104.00            | 167.00            | 196.00           | 140.00                     | 138.00                    | 29.00              | 30.00             | 71.00              | 66.00             |
| D5   | 8.60                  | 11.00                | 106.00             | 119.00            | 122.00            | 147.00           | 182.00                     | 189.00                    | 42.00              | 41.00             | 114.00             | 116.00            |

FBS: fasting blood glucose; TG: triglyceride; LDL: Low-density lipoprotein; HDL: High-density lipoprotein

**Supplementary Table 1** (cont.): Raw data of the age, sex and liver function tests and fibroscan in each group before and after intervention. The below raw data are related to Table 1 and 2 in the main text.

| Code | AST (U/L) Before | AST (U/L) After | ALT (U/L) Before | ALT (U/L) After | GGT (U/L) Before | GGT (U/L) After | Fibroscore (KPa) Before | Steatosis score (CAP) Before | Sex (male/female) | Age (year) |
|------|------------------|-----------------|------------------|-----------------|------------------|-----------------|-------------------------|------------------------------|-------------------|------------|
| A11  | 20.00            | 24.00           | 18.00            | 18.00           | 45.00            | 38.00           | 5.00                    | 300.00                       | male              | 41.00      |
| A15  | 17.00            | 13.00           | 10.00            | 8.00            | 26.00            | 28.00           | 5.00                    | 340.00                       | female            | 47.00      |
| A17  | 18.00            | 18.00           | 19.00            | 15.00           | 24.00            | 22.00           | 4.50                    | 270.00                       | male              | 36.00      |
| A19  | 17.00            | 15.00           | 18.00            | 10.00           | 21.00            | 18.00           | 4.00                    | 325.00                       | male              | 49.00      |
| A5   | 34.00            | 19.00           | 28.00            | 20.00           | 46.00            | 37.00           | 7.00                    | 300.00                       | female            | 47.00      |
| A9   | 22.00            | 25.00           | 27.00            | 50.00           | 50.00            | 65.00           | 5.30                    | 285.00                       | male              | 40.00      |
| B11  | 26.00            | 29.00           | 11.00            | 19.00           | 28.00            | 27.00           | 13.00                   | 399.00                       | male              | 49.00      |
| B12  | 39.00            | 21.00           | 31.00            | 13.00           | 46.00            | 37.00           | 8.00                    | 350.00                       | male              | 49.00      |
| B19  | 25.00            | 21.00           | 19.00            | 11.00           | 30.00            | 22.00           | 4.50                    | 305.00                       | male              | 39.00      |
| B25  | 35.00            | 27.00           | 46.00            | 28.00           | 30.00            | 28.00           | 7.00                    | 360.00                       | male              | 39.00      |
| B3   | 40.00            | 24.00           | 45.00            | 25.00           | 42.00            | 29.00           | 5.00                    | 325.00                       | male              | 40.00      |
| B7   | 31.00            | 29.00           | 26.00            | 26.00           | 64.00            | 65.00           | 10.00                   | 370.00                       | male              | 46.00      |
| B8   | 21.00            | 24.00           | 23.00            | 26.00           | 35.00            | 36.00           | 7.00                    | 300.00                       | male              | 45.00      |
| C1   | 21.00            | 17.00           | 19.00            | 16.00           | 23.00            | 13.00           | 6.00                    | 320.00                       | female            | 46.00      |
| C12  | 26.00            | 28.00           | 19.00            | 19.00           | 22.00            | 18.00           | 8.50                    | 365.00                       | male              | 43.00      |
| C2   | 23.00            | 20.00           | 18.00            | 19.00           | 28.00            | 27.00           | 5.50                    | 300.00                       | male              | 51.00      |
| C21  | 21.00            | 19.00           | 15.00            | 9.00            | 25.00            | 20.00           | 5.30                    | 303.00                       | male              | 53.00      |
| C3   | 35.00            | 31.00           | 34.00            | 32.00           | 81.00            | 54.00           | 11.50                   | 270.00                       | male              | 43.00      |
| C6   | 20.00            | 30.00           | 21.00            | 29.00           | 31.00            | 22.00           | 6.80                    | 356.00                       | male              | 49.00      |
| D11  | 23.00            | 17.00           | 18.00            | 12.00           | 15.00            | 13.00           | 4.50                    | 260.00                       | male              | 46.00      |
| D19  | 20.00            | 18.00           | 15.00            | 13.00           | 22.00            | 28.00           | 5.00                    | 383.00                       | female            | 43.00      |
| D2   | 24.00            | 25.00           | 20.00            | 24.00           | 19.00            | 22.00           | 5.50                    | 340.00                       | female            | 50.00      |
| D21  | 13.00            | 32.00           | 9.00             | 17.00           | 38.00            | 188.00          | 5.00                    | 300.00                       | male              | 48.00      |
| D22  | 23.00            | 31.00           | 24.00            | 23.00           | 54.00            | 66.00           | 6.00                    | 285.00                       | male              | 40.00      |
| D3   | 26.00            | 32.00           | 16.00            | 20.00           | 34.00            | 33.00           | 8.50                    | 318.00                       | male              | 42.00      |
| D5   | 28.00            | 20.00           | 18.00            | 18.00           | 28.00            | 26.00           | 4.30                    | 280.00                       | male              | 52.00      |

ALT: alanin aminotransferase; AST: aspartate aminotransferase; GGT:  $\gamma$ -glutamyl transferase

**Supplementary Table 2:** Raw data of the log<sub>10</sub> number per gram of feces of *Lactobacillus* in each group. The below raw data are related to Figure 2 in the main text.

| groups | log <sub>10</sub> number per gram |      |      |      |      |      |      |       |      |      |      |      |      |      |
|--------|-----------------------------------|------|------|------|------|------|------|-------|------|------|------|------|------|------|
|        | Before                            |      |      |      |      |      |      | After |      |      |      |      |      |      |
| CFCA   | 7.54                              | 6.43 | 5.45 | 8.54 | 9.34 | 8.54 | 7.45 | 7.89  | 7.64 | 5.63 | 8.56 | 9.56 | 8.45 | 8.76 |
| CFPL   | 7.43                              | 6.56 | 5.98 | 7.67 | 8.87 | 9.67 |      | 7.67  | 6.52 | 6.34 | 8.43 | 9.45 | 8.12 |      |
| CAPL   | 8.23                              | 7.45 | 5.87 | 6.98 | 9.34 | 8.45 |      | 7.87  | 6.45 | 5.43 | 8.67 | 9.43 | 7.65 |      |
| PLPL   | 8.46                              | 7.76 | 5.87 | 7.56 | 8.67 | 8.89 |      | 7.12  | 6.45 | 5.75 | 8.67 | 9.56 | 8.45 |      |

CF: Chlorogenic acid; CA: caffeine; PL: placebo

**Supplementary Table 2 (cont.):** Raw data of the log<sub>10</sub> number per gram of feces of *Bacteroides* in each group. The below raw data are related to Figure 2 in the main text.

| groups | log <sub>10</sub> number per gram |      |      |      |      |      |      |       |      |      |      |      |      |      |
|--------|-----------------------------------|------|------|------|------|------|------|-------|------|------|------|------|------|------|
|        | Before                            |      |      |      |      |      |      | After |      |      |      |      |      |      |
| CFCA   | 6.5                               | 5.8  | 7.44 | 6.4  | 5.12 | 6.34 | 6.45 | 5.98  | 5.56 | 6.98 | 6.12 | 6.23 | 6.45 | 6.24 |
| CFPL   | 5.45                              | 7.45 | 6.53 | 6.76 | 6.87 | 7.34 |      | 5.56  | 6.98 | 6.43 | 6.73 | 6.75 | 7.12 |      |
| CAPL   | 4.56                              | 5.76 | 6.87 | 7.98 | 8.76 | 6.5  |      | 5.01  | 5.76 | 6.78 | 8.12 | 8.5  | 6.23 |      |
| PLPL   | 6.5                               | 5.98 | 7.5  | 6.43 | 6.45 | 4.98 |      | 6.52  | 6.02 | 8.23 | 6.52 | 6.63 | 6.54 |      |

CF: Chlorogenic acid; CA: caffeine; PL: placebo

**Supplementary Table 2** (cont.): Raw data of the log<sub>10</sub> number per gram of feces of *Bifidobacterium* in each group. The below raw data are related to Figure 2 in the main text.

| groups | log <sub>10</sub> number per gram |      |      |      |       |       |      |       |      |      |      |       |      |      |
|--------|-----------------------------------|------|------|------|-------|-------|------|-------|------|------|------|-------|------|------|
|        | Before                            |      |      |      |       |       |      | After |      |      |      |       |      |      |
| CFCA   | 8.22                              | 7.54 | 5.45 | 9.34 | 10.21 | 9.32  | 8.55 | 8.65  | 7.64 | 8.45 | 9.54 | 10.43 | 9.5  | 9.32 |
| CFPL   |                                   | 7.43 | 6.13 | 8.55 | 9.98  | 10.12 |      | 8.46  | 6.52 | 6.34 | 9.36 | 10.32 | 9.43 |      |
| CAPL   |                                   | 8.23 | 6.32 | 7.45 | 10.34 | 9.46  |      | 8.54  | 7.43 | 5.43 | 9.42 | 11    | 8.88 |      |
| PLPL   |                                   | 8.46 | 6.54 | 8.45 | 9.86  | 9.96  |      | 8.12  | 7.44 | 5.75 | 9.76 | 10.43 | 9.35 |      |

CF: Chlorogenic acid; CA: caffeine; PL: placebo
